# Supplementary material for: Identification of Biomarkers and Pathogenesis in Severe Asthma by Co-expression Network Analysis
Source: Research Square preprint supplement (doi:10.21203/rs.3.rs-123118/v1), 2020-12-10
Supplement: Supplementary file 2 [file 3cea6ce2d5bd891dae8902c7.docx]

**Identification of Biomarkers and Pathogenesis in Severe Asthma by Co-expression Network Analysis**

Zeyi Zhang, Jingjing Wang, Ou Chen

Author affiliations: School of Nursing and Rehabilitation, Cheeloo College of Medicine, Shandong University

#44 West Wenhua Road, Jinan250012, China

First author: Zeyi Zhang

Email: Zhzeyi@outlook.com

*Correspondence: Chen Ou

School of Nursing and Rehabilitation, Shandong University, #44 West Wenhua Road, Jinan 250012, China

Tel **:** 86+15990991181

Fax **:** 0531-88382201

Email ：[chenou@sdu.edu.cn](mailto:chenou@sdu.edu.cn)


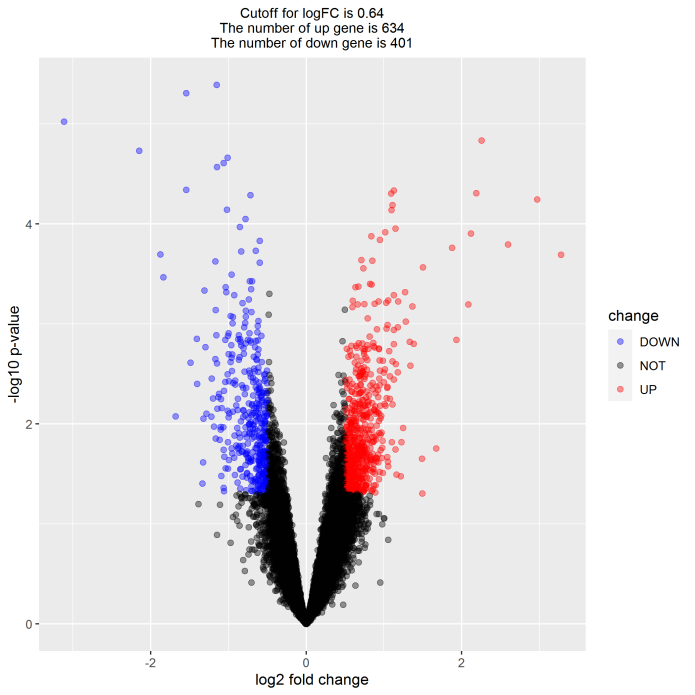
Figure S1. Volcano plot of all probesets


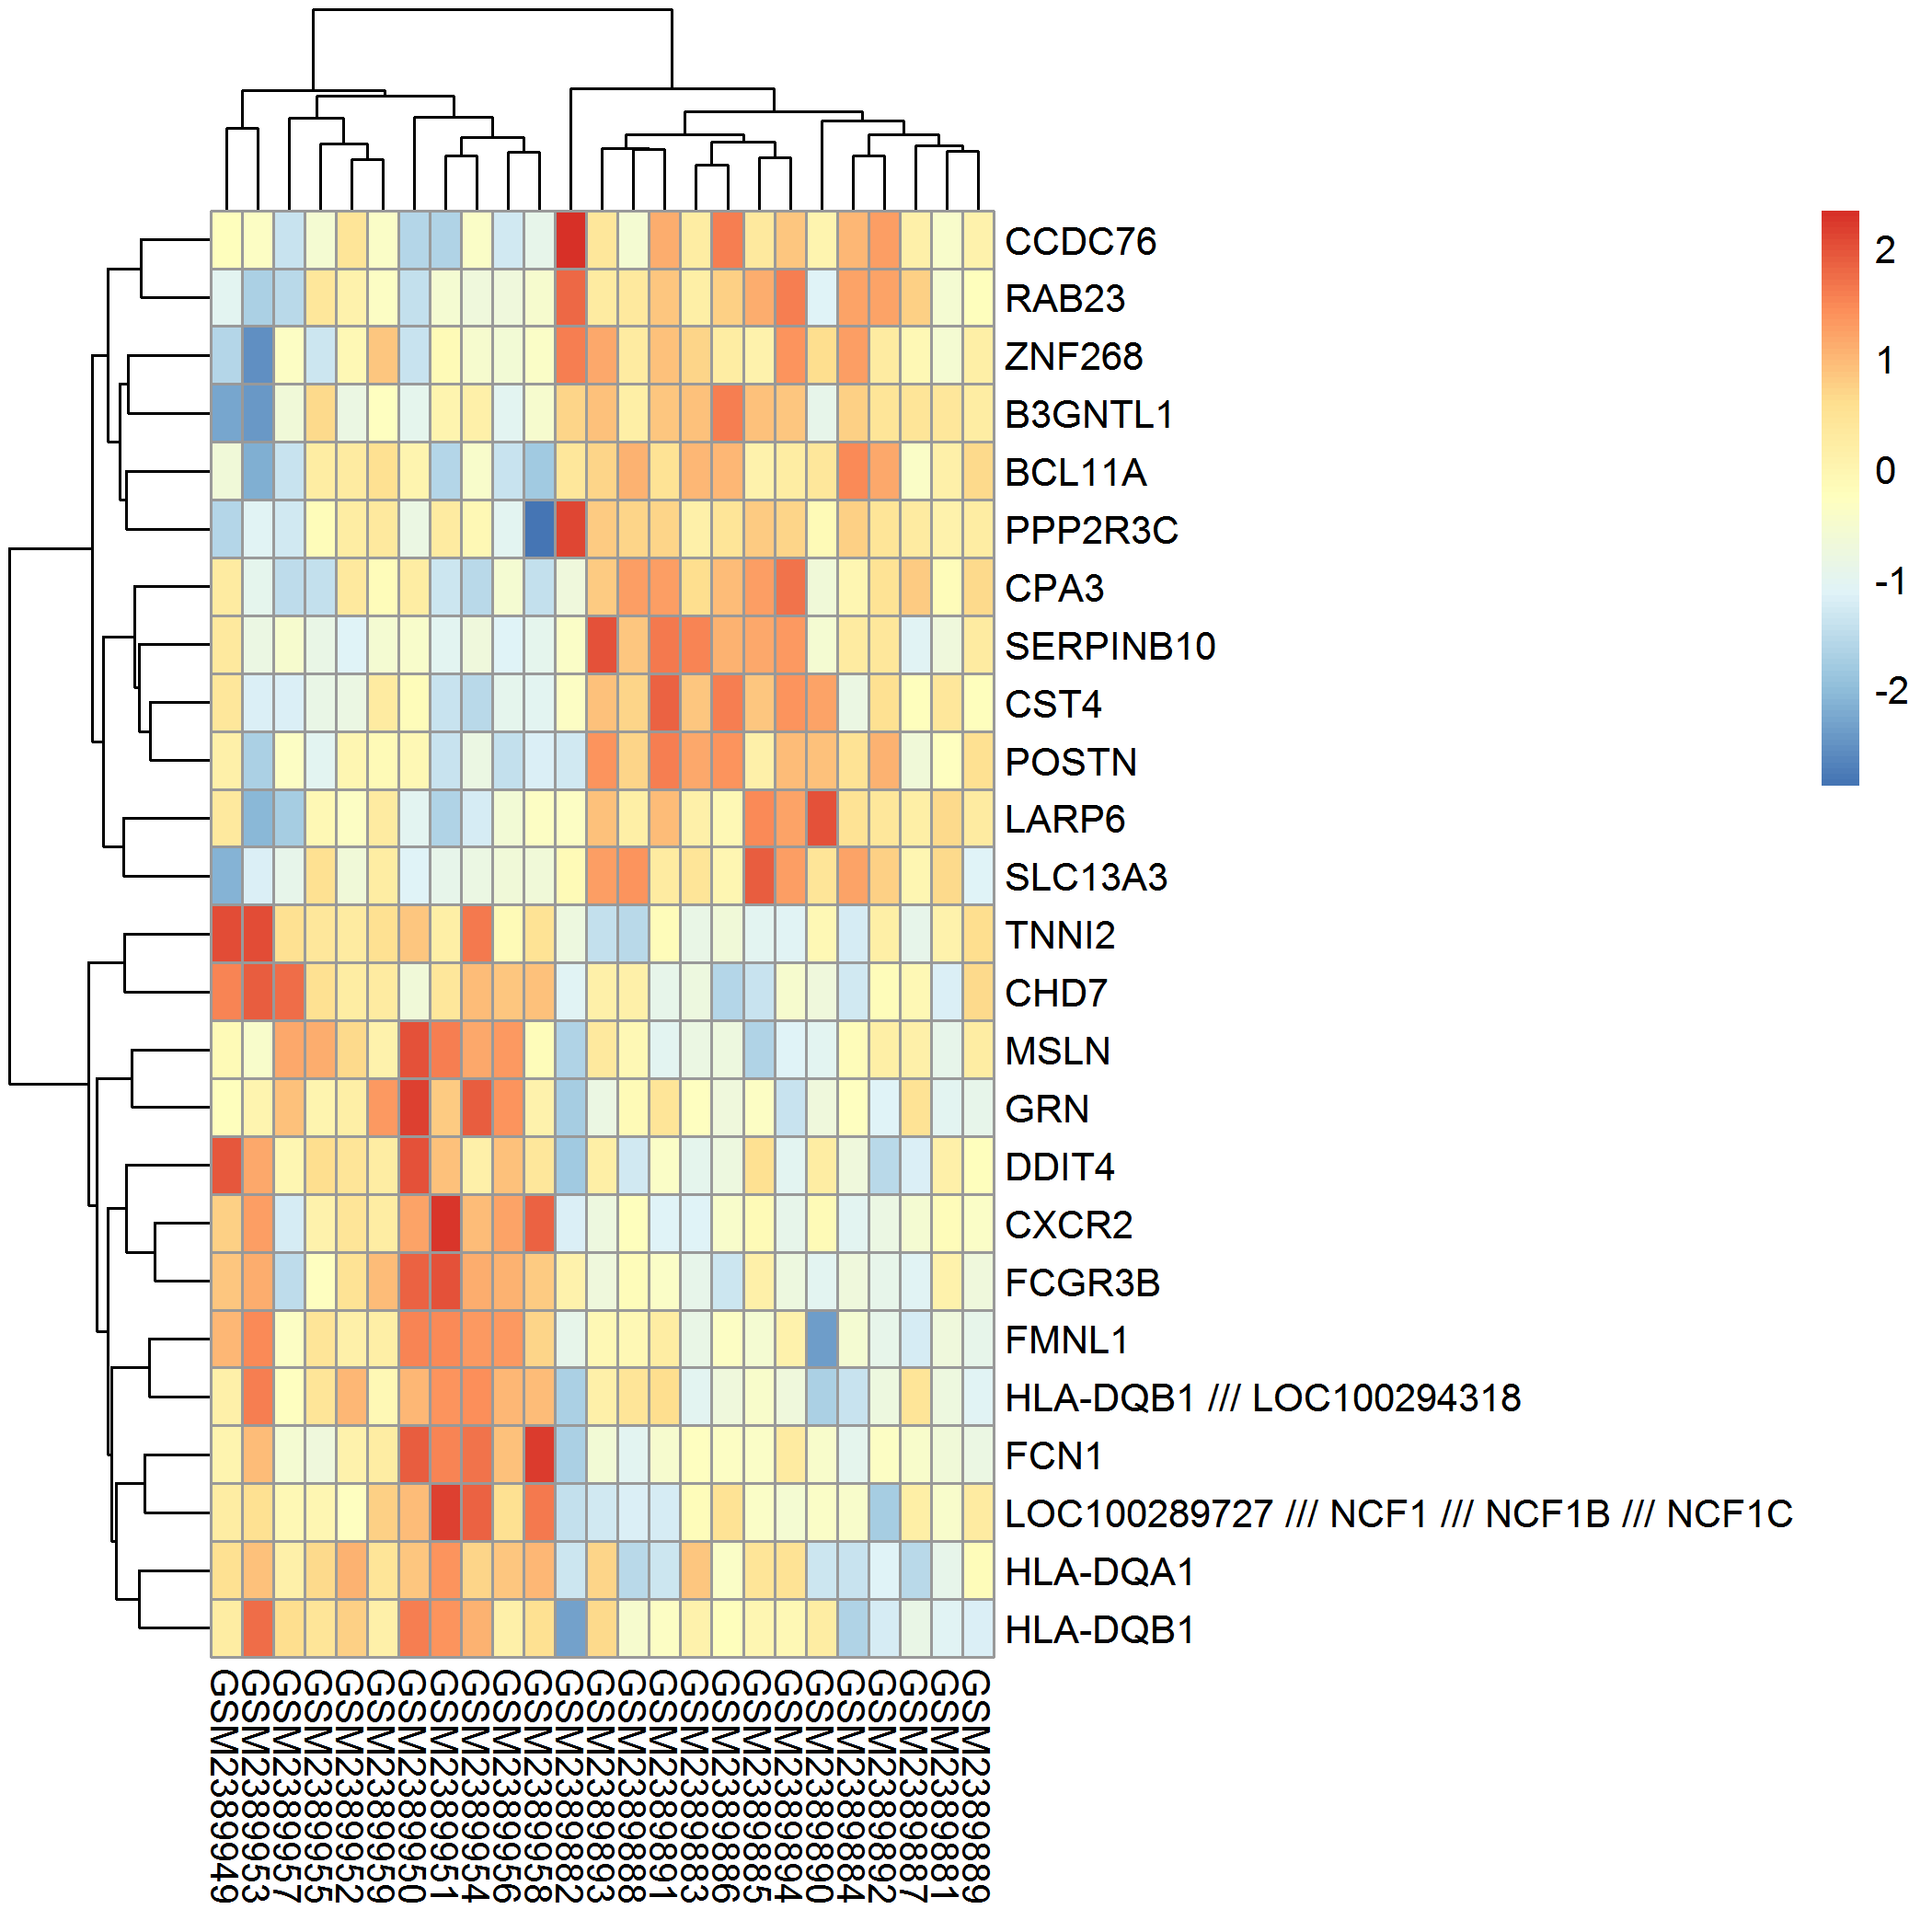
Figure S2. Heatmap of the top 25 changed genes


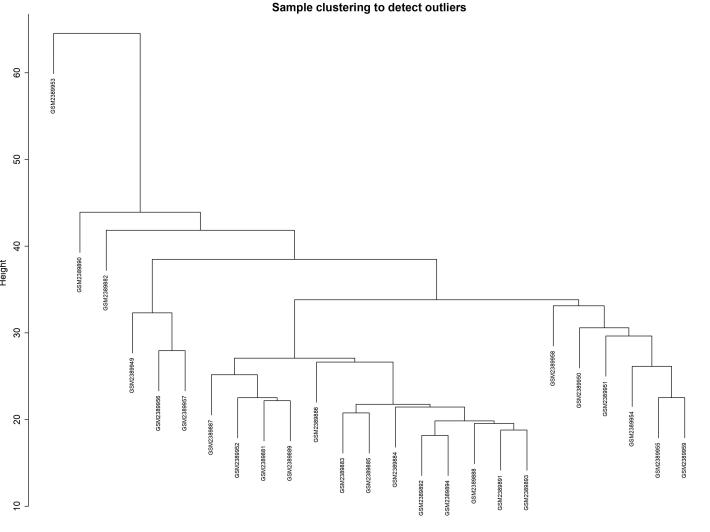
Figure S3. Hierarchical clustering analysis


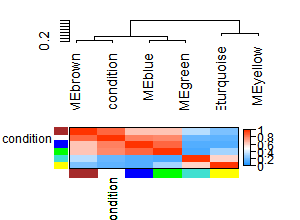
Figure S4. The eigengene dendrogram and heatmap


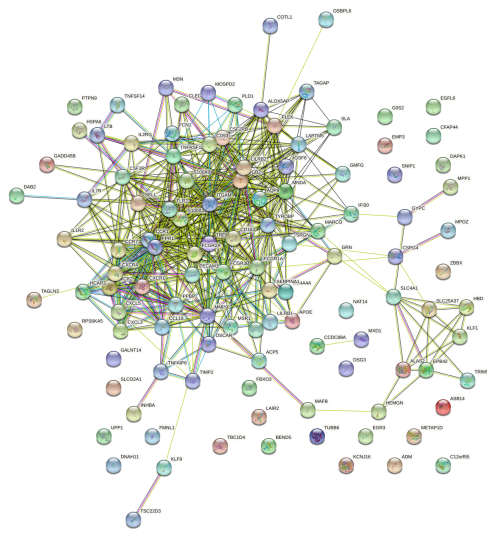
Figure S5. Brown module visualized in String database


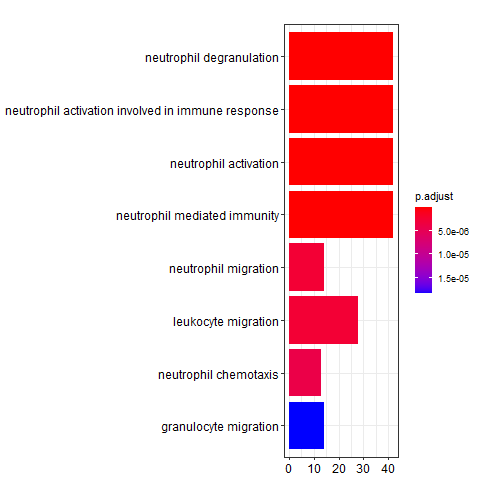
Figure S6. GO enrichment analysis of genes in modules positively related to asthma severity


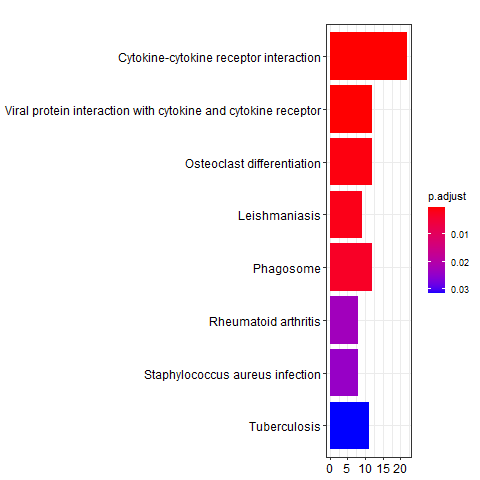
Figure S7. KEGG enrichment analysis of genes in modules positively related to asthma severity


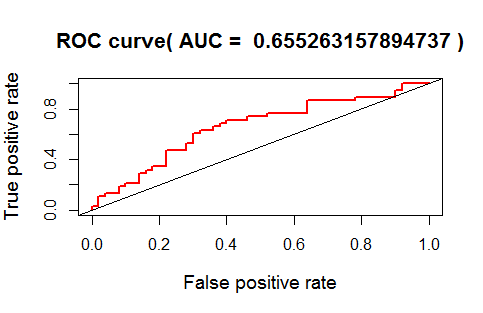
Figure S8. Receiver operating characteristics curve analyses of CXCR2


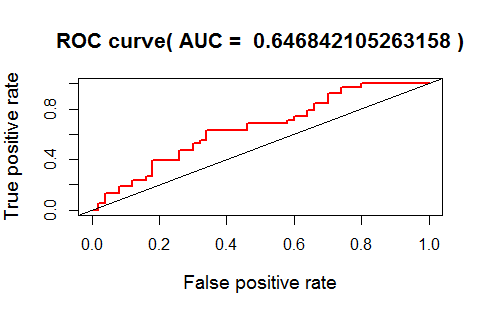
Figure S9. Receiver operating characteristics curve analyses of CXCR1


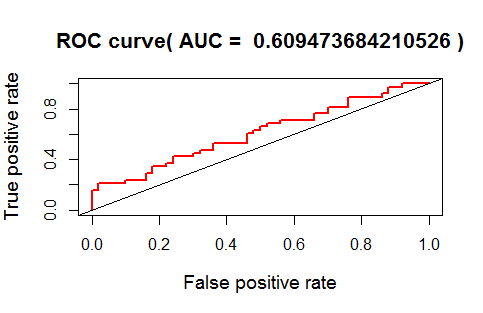
Figure S10. Receiver operating characteristics curve analyses of TLR2


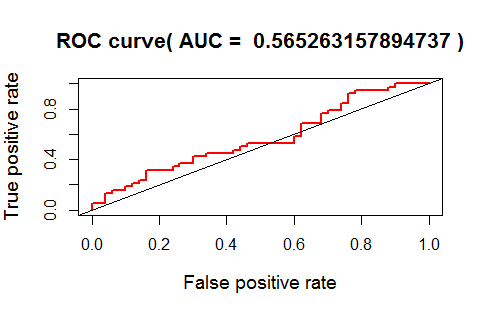
Figure S11 Receiver operating characteristics curve analyses of FPR1


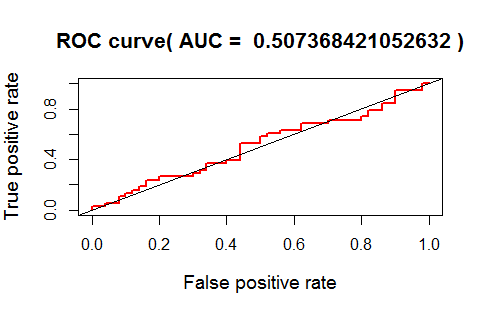
Figure S12. Receiver operating characteristics curve analyses of CCR1


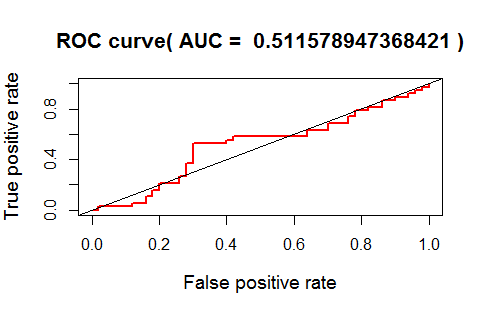
Figure S13. Receiver operating characteristics curve analyses of FCGR3B


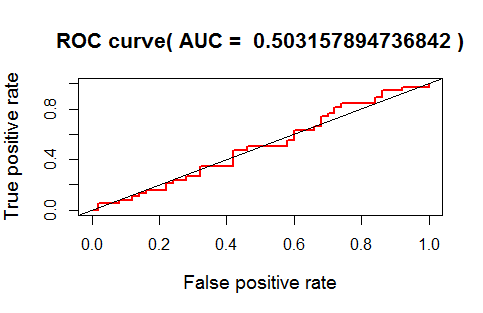
Figure S14. Receiver operating characteristics curve analyses of ITGAM


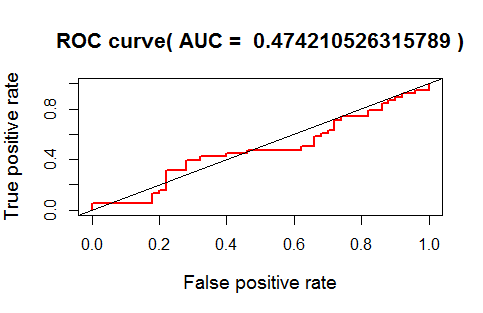
Figure S15. Receiver operating characteristics curve analyses of FCGR2A


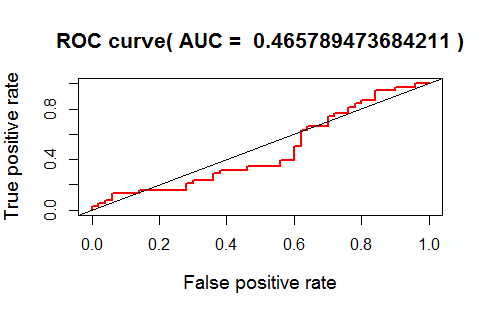
Figure S16. Receiver operating characteristics curve analyses of CCR7


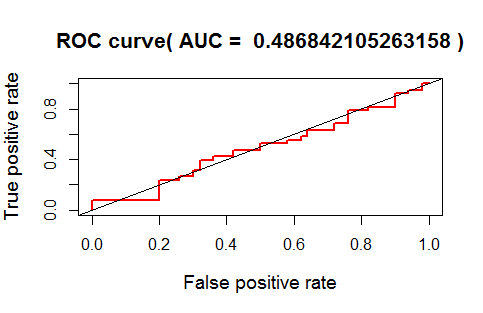
Figure S17. Receiver operating characteristics curve analyses of PLEK
